# Supplementary material for: A Recurrent Inflammatory Myofibroblastic Tumor-like Lesion of the Splenic Capsule in a Kitten: Clinical, Microscopic and Ultrastructural Description
Source: MDPI journal article supplement (doi:10.3390/vetsci8110275), 2021-11-12
Supplement: s1 [file s1]

*Case report*

# A Recurrent Inflammatory Myofibroblastic Tumor-like Lesion of the Splenic Capsule in a Kitten: Clinical, Microscopic and Ultrastructural Description

Silvia Ferro, David Chiavegato, Piergiorgio Fiorentin, Valentina Zappulli and Stefano Di Palma

## Supplementary Materials

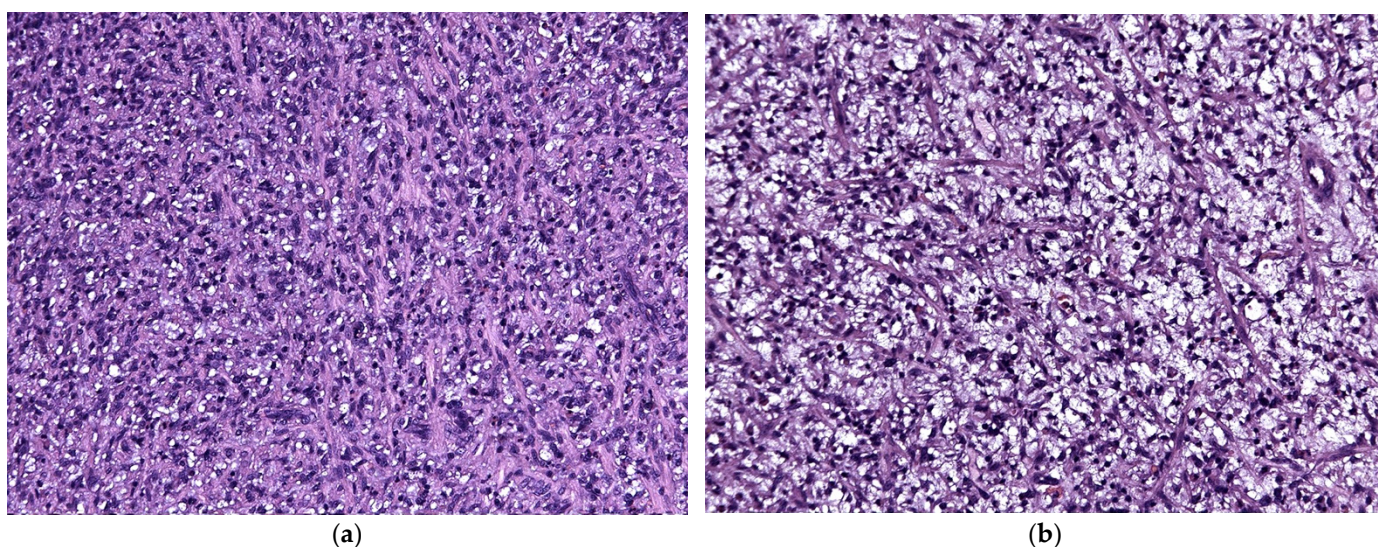

**Figure S1.** Inflammatory myofibroblastic tumor, cat. Spindle cells are embedded in a variably compact (a) and loose (b) matrix. Hematoxylin Eosin.

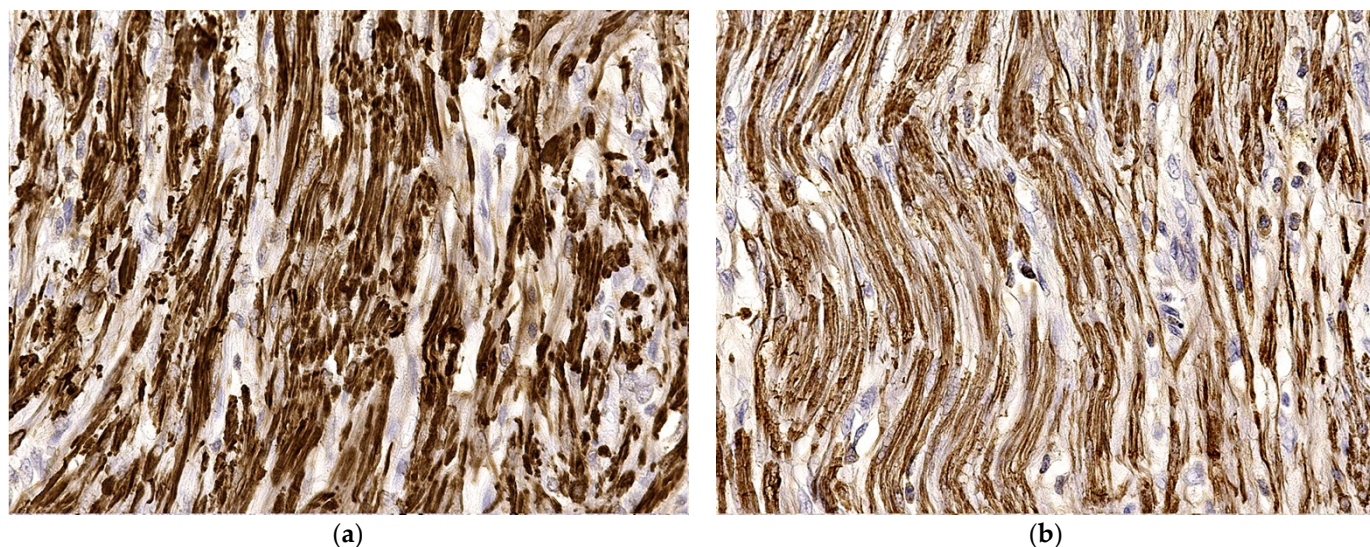



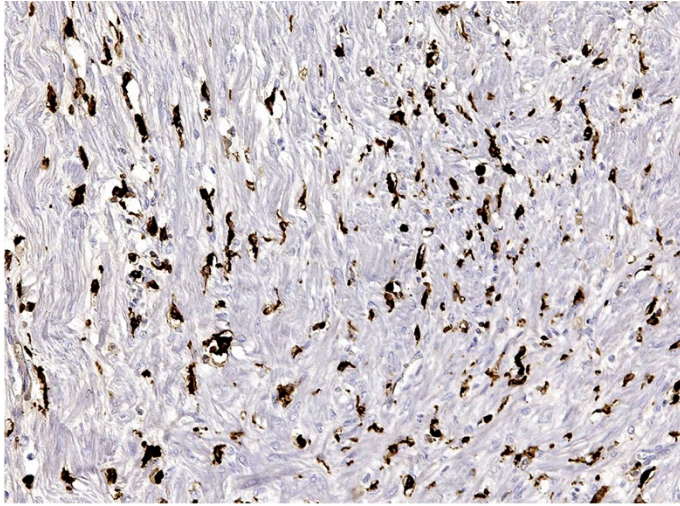

(c)

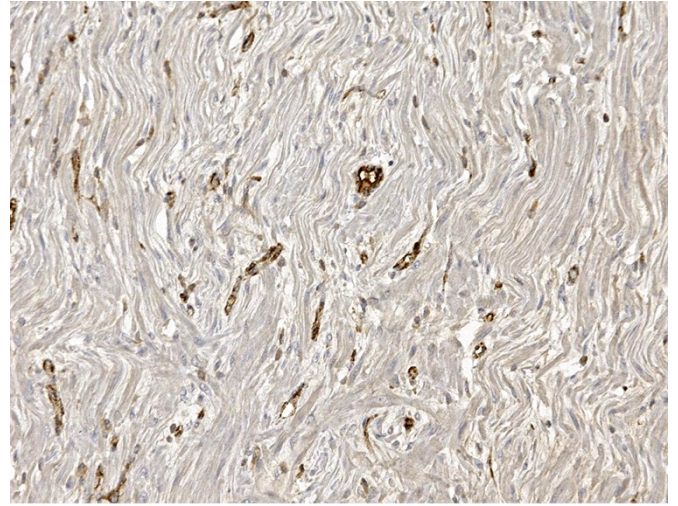

(d)

**Figure S2.** Inflammatory myofibroblastic tumor, cat. Immunohistochemistry (IHC). (a) Atypical cells diffusely show strong cytoplasmic immunolabeling for desmin. (b) Neoplastic cells also show moderate cytoplasmic immunolabeling for calponin. (c) Scattered among the spindle population there are histiocytes with marked cytoplasmic immunolabeling for HLA-dr. (d) Immunohistochemistry reveals frequent disseminated capillaries. IHC for VWF.

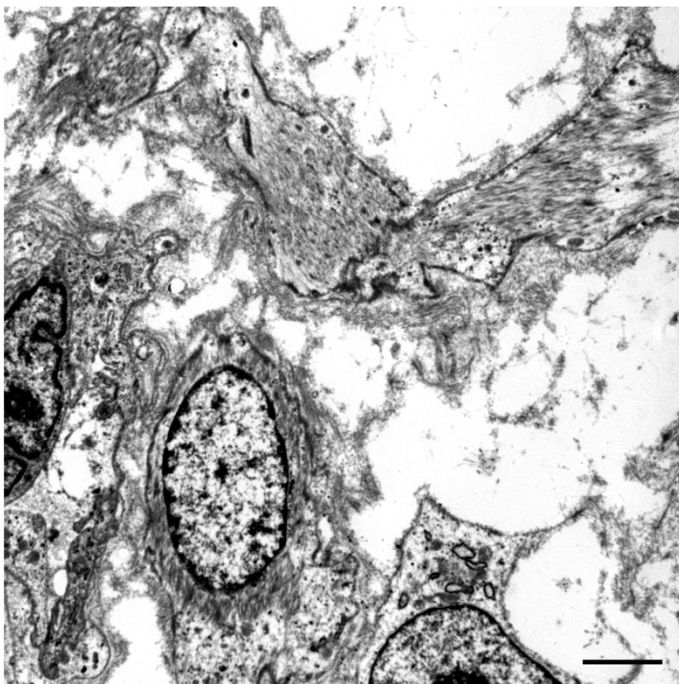

(a)

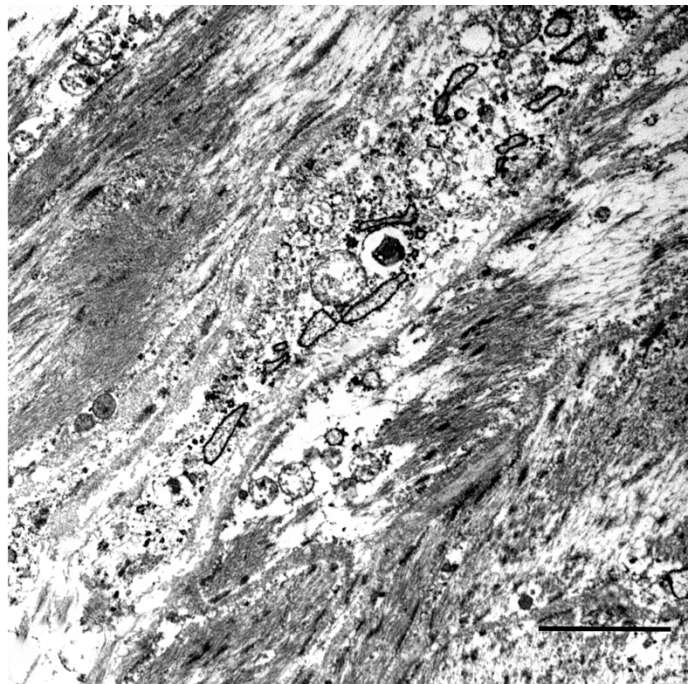

(b)

**Figure S3.** Inflammatory myofibroblastic tumor, cat. Transmission Electron Microscopy. (a) A myofibroblastic spindle cell (arrow) with fibrillar cytoplasm embedded in an edematous and fibrillar matrix. Bar = 2 microns. (b) Densely fibrillar cytoplasm of the spindle population. Bar = 2 microns.
